# Supplementary material for: Hierarchically porous germanium-modified carbon materials with enhanced lithium storage performance
Source: Royal Society of Chemistry journal article supplement (doi:10.1039/c2nr31533e), 2012-01-01
Supplement: c2nr31533e.pdf [file c2nr31533e.pdf]

Electronic supplementary material (ESI) for Nanoscale

## **Hierarchically porous germanium modified carbon materials with enhanced lithium storage performance**

Ying Xiao, Minhua Cao<sup>\*</sup>, Ling Ren and Changwen Hu

Key Laboratory of Cluster Science, Ministry of Education of China, Department of Chemistry, Beijing Institute of Technology, Beijing 100081, P. R. China

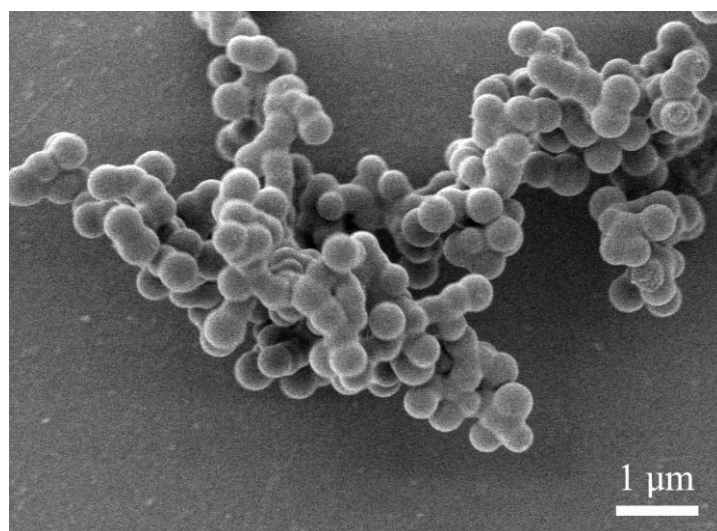

**Fig. S1** The SEM image of the pure carbon spheres.

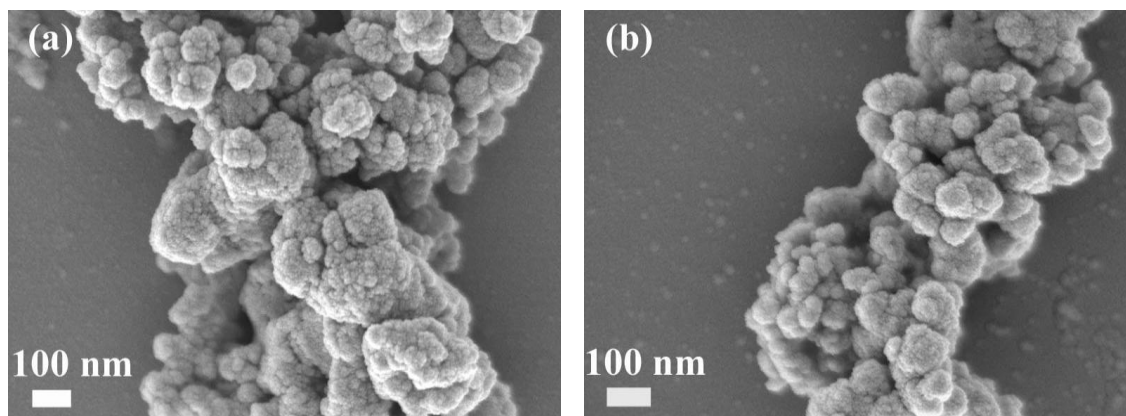

**Fig. S2** The SEM images of the products with different usages of glucose: (a) 1.5 g and (b) 2.5 g.
